# Supplementary material for: Systemic delivery of MicroRNA mimics with polyethylenimine elevates pulmonary microRNA levels, but lacks pulmonary selectivity
Source: PubMed Central journal article supplement — Pulm Circ. 2017 Dec 18;8(1):2045893217750613. doi: 10.1177/2045893217750613 (PMC5753929; doi:10.1177/2045893217750613), 2017-12-18
Supplement: supplementary_material.pdf [file supplementary_material.pdf]

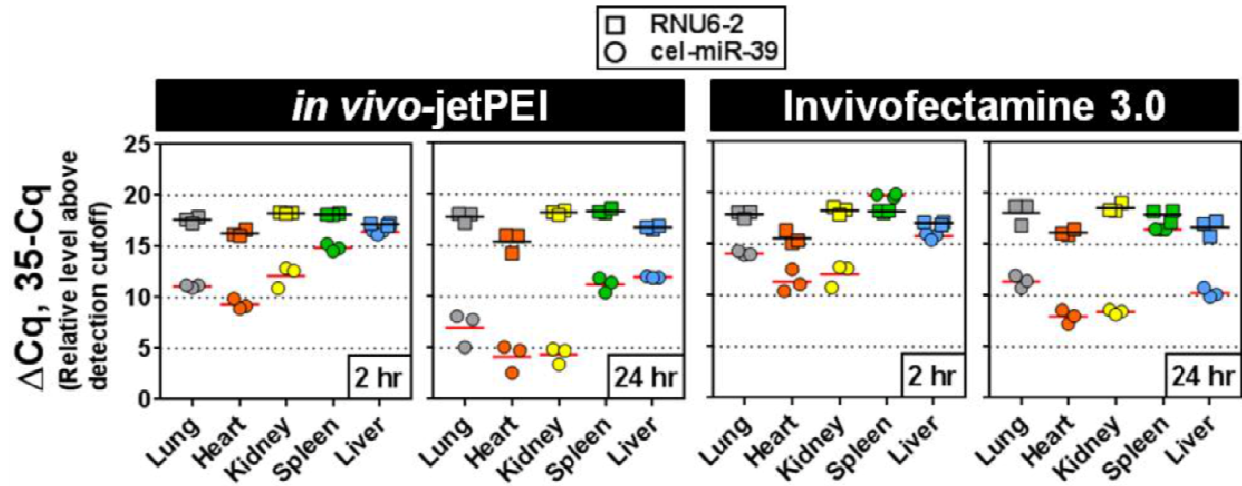

**Supplementary Figure 1. Tissue biodistribution of cel-miR-39 mimic after jugular vein infusion with *in vivo*-jetPEI or invivolectamine 3.0 vehicle.** Raw PCR quantification cycles (Cq) of cel-miR-39 (circle) and the internal reference control, RNU6-2 (square). Data are presented as the relative level above the predefined PCR detection cutoff ( $\Delta Cq = 35 - Cq$ ). Individual biological replicates are shown (n=3 rats/timepoint/vehicle). Horizontal lines denote mean levels.
